# Supplementary material for: FIGHT‐102: A phase 1 study of pemigatinib in Japanese patients with advanced malignancies
Source: PubMed Central journal article supplement (PMC10225205; doi:10.1002/cam4.5798), 2023-03-31

## SUPPLEMENTARY MATERIAL

### **FIGHT-102: A phase 1 study of pemigatinib in Japanese patients with advanced malignancies**

Yukata Fujiwara,<sup>1,2</sup> Yasutoshi Kuboki,<sup>3\*</sup> Masayuki Furukawa,<sup>4</sup> Nobumasa Mizuno,<sup>2</sup> Hiroki Hara,<sup>5</sup> Tatsuya Ioka,<sup>6</sup> Makoto Ueno,<sup>7</sup> Yasuo Takahashi,<sup>8</sup> Shunji Takahashi,<sup>9</sup> Shinji Takeuchi,<sup>10</sup> Christine Lihou,<sup>11</sup> Tao Ji,<sup>11</sup> Chenwei Tian,<sup>11</sup> Toshio Shimizu<sup>1,12</sup>

#### **Affiliations**

<sup>1</sup>National Cancer Center Hospital, Chuo-ku, Tokyo, Japan; <sup>2</sup>Aichi Cancer Center, Chikusa-ku, Nagoya, Japan; <sup>3</sup>National Cancer Central Hospital East, Kashiwa, Chiba, Japan; <sup>4</sup>Kyushu Cancer Center, Minami-ku, Fukuoka, Japan; <sup>5</sup>Saitama Cancer Center, Saitama, Japan; <sup>6</sup>Department of Oncology Center, Yamaguchi University Hospital, Ube, Japan; <sup>7</sup>Kanagawa Cancer Center, Yokohama, Kanagawa, Japan; <sup>8</sup>Hokkaido Cancer Center, Sapporo, Japan; <sup>9</sup>Cancer Institute Hospital of JFCR, Ariake, Koto-ku, Tokyo, Japan; <sup>10</sup>Kanazawa University Hospital, Japan; <sup>11</sup>Incyte Corporation, Wilmington, DE, USA; <sup>12</sup>Wakayama Medical University, Wakayama, Japan

#### **\*Correspondence:**

Prof. Yasutoshi Kuboki, MD, PhD

National Cancer Central Hospital East

6-5-1 Kashiwanoha, Kashiwa-shi

Chiba, 277-8577

Japan

Email: [ykuboki@east.ncc.go.jp](mailto:ykuboki@east.ncc.go.jp)

## Supplementary Tables

**Supplementary Table 1.** *FGF/FGFR* status at baseline

| Centrally confirmed <i>FGF/FGFR</i> alterations at baseline <sup>a,b</sup> , n (%) | Pemigatinib intermittent dosing |                  |               |                   | Pemigatinib continuous dosing | Total (n = 44) |
|------------------------------------------------------------------------------------|---------------------------------|------------------|---------------|-------------------|-------------------------------|----------------|
|                                                                                    | 9 mg (n = 3)                    | 13.5 mg (n = 23) | 18 mg (n = 5) | Subtotal (n = 31) | 13.5 mg (n = 13)              |                |
| <i>FGFR1</i> amplification                                                         | 0                               | 8 (34.8)         | 0             | 8 (25.8)          | 3 (23.1)                      | 11 (25.0)      |
| <i>FGFR 2</i> amplification                                                        | 0                               | 2 (8.7)          | 0             | 2 (6.5)           | 1 (7.7)                       | 3 (6.8)        |
| <i>FGFR2</i> translocation                                                         | 0                               | 1 (4.3)          | 0             | 1 (3.2)           | 0                             | 1 (2.3)        |
| <i>FGFR3</i> alteration                                                            | 0                               | 0                | 0             | 0                 | 1 (7.7)                       | 1 (2.3)        |
| <i>FGFR3</i> mutation                                                              | 0                               | 2 (8.7)          | 0             | 2 (6.5)           | 0                             | 2 (4.5)        |
| <i>FGFR3</i> translocation                                                         | 0                               | 0                | 0             | 0                 | 1 (7.7)                       | 1 (2.3)        |
| <i>FGF1</i> amplification                                                          | 0                               | 1 (4.3)          | 0             | 1 (3.2)           | 0                             | 1 (2.3)        |
| <i>FGF3</i> amplification                                                          | 0                               | 6 (26.1)         | 0             | 6 (19.4)          | 3 (23.1)                      | 9 (20.5)       |
| <i>FGF4</i> amplification                                                          | 0                               | 5 (21.7)         | 0             | 5 (16.1)          | 3 (23.1)                      | 8 (18.2)       |
| <i>FGF6</i> mutation                                                               | 0                               | 1 (4.3)          | 0             | 1 (3.2)           | 0                             | 1 (2.3)        |
| <i>FGF12</i> amplification                                                         | 0                               | 2 (8.7)          | 0             | 2 (6.5)           | 0                             | 2 (4.5)        |
| <i>FGF19</i> amplification                                                         | 0                               | 5 (21.7)         | 0             | 5 (16.1)          | 3 (23.1)                      | 8 (18.2)       |

FGF, fibroblast growth factor; FGFR, fibroblast growth factor receptor. <sup>a</sup>Locally identified *FGF/FGFR* alterations are not presented in the table.

<sup>b</sup>Some patients had more than 1 relevant alteration.

**Supplementary Table 2.** Treatment-related adverse events<sup>a</sup>

| Number of events (%)               | Pemigatinib intermittent dosing |          |                  |          |               |          |                   |          | Pemigatinib continuous dosing |          | Total (N = 44) |          |
|------------------------------------|---------------------------------|----------|------------------|----------|---------------|----------|-------------------|----------|-------------------------------|----------|----------------|----------|
|                                    | 9 mg (n = 3)                    |          | 13.5 mg (n = 23) |          | 18 mg (n = 5) |          | Subtotal (n = 31) |          | 13.5 mg (n = 13)              |          |                |          |
|                                    | All grades                      | Grade ≥3 | All grades       | Grade ≥3 | All grades    | Grade ≥3 | All grades        | Grade ≥3 | All grades                    | Grade ≥3 | All grades     | Grade ≥3 |
| Hyperphosphatemia                  | 2 (66.7)                        | 0        | 18 (78.3)        | 0        | 5 (100.0)     | 0        | 25 (80.6)         | 0        | 11 (84.6)                     | 0        | 36 (81.8)      | 0        |
| Dysgeusia                          | 1 (33.3)                        | 0        | 7 (30.4)         | 0        | 2 (40.0)      | 0        | 10 (32.3)         | 0        | 8 (61.5)                      | 0        | 18 (40.9)      | 0        |
| Stomatitis                         | 1 (33.3)                        | 0        | 3 (13.0)         | 0        | 4 (80.0)      | 0        | 8 (25.8)          | 0        | 10 (76.9)                     | 1 (7.7)  | 18 (40.9)      | 1 (2.3)  |
| Alopecia                           | 1 (33.3)                        | 0        | 7 (30.4)         | 0        | 2 (40.0)      | 0        | 10 (32.3)         | 0        | 7 (53.8)                      | 0        | 17 (38.6)      | 0        |
| Nausea                             | 0                               | 0        | 7 (30.4)         | 0        | 3 (60.0)      | 0        | 10 (32.3)         | 0        | 4 (30.8)                      | 0        | 14 (31.8)      | 0        |
| Diarrhea                           | 1 (33.3)                        | 0        | 4 (17.4)         | 0        | 1 (20.0)      | 0        | 6 (19.4)          | 0        | 7 (53.8)                      | 1 (7.7)  | 13 (29.5)      | 1 (2.3)  |
| Decreased appetite                 | 0                               | 0        | 4 (17.4)         | 0        | 3 (60.0)      | 2 (40.0) | 7 (22.6)          | 0        | 4 (30.8)                      | 1 (7.7)  | 11 (25.0)      | 1 (2.3)  |
| Blood creatinine increased         | 0                               | 0        | 4 (17.4)         | 0        | 1 (20.0)      | 0        | 5 (16.1)          | 0        | 1 (7.7)                       | 0        | 6 (13.6)       | 0        |
| Fatigue                            | 0                               | 0        | 2 (8.7)          | 0        | 1 (20.0)      | 0        | 3 (9.7)           | 0        | 3 (23.1)                      | 0        | 6 (13.6)       | 0        |
| Paronychia                         | 0                               | 0        | 2 (8.7)          | 0        | 0             | 0        | 2 (6.5)           | 0        | 4 (30.8)                      | 0        | 6 (13.6)       | 0        |
| Alanine aminotransferase increased | 1 (33.3)                        | 0        | 2 (8.7)          | 0        | 0             | 0        | 3 (9.7)           | 0        | 2 (15.4)                      | 1 (7.7)  | 5 (11.4)       | 1 (2.3)  |
| Arthralgia                         | 0                               | 0        | 2 (8.7)          | 0        | 0             | 0        | 2 (6.5)           | 0        | 3 (23.1)                      | 0        | 5 (11.4)       | 0        |

|                                            |          |   |          |   |   |   |          |   |          |         |          |         |
|--------------------------------------------|----------|---|----------|---|---|---|----------|---|----------|---------|----------|---------|
| Aspartate aminotransferase increased       | 0        | 0 | 3 (13.0) | 0 | 0 | 0 | 3 (9.7)  | 0 | 2 (15.4) | 1 (7.7) | 5 (11.4) | 1 (2.3) |
| Dry mouth                                  | 0        | 0 | 1 (4.3)  | 0 | 0 | 0 | 1 (3.2)  | 0 | 4 (30.8) | 0       | 5 (11.4) | 0       |
| Keratitis                                  | 1 (33.3) | 0 | 2 (8.7)  | 0 | 0 | 0 | 3 (9.7)  | 0 | 2 (15.4) | 0       | 5 (11.4) | 0       |
| Malaise                                    | 0        | 0 | 2 (8.7)  | 0 | 0 | 0 | 2 (6.5)  | 0 | 3 (23.1) | 0       | 5 (11.4) | 0       |
| Onychomadesis                              | 0        | 0 | 2 (8.7)  | 0 | 0 | 0 | 2 (6.5)  | 0 | 3 (23.1) | 0       | 5 (11.4) | 0       |
| Palmar-plantar erythrodysesthesia syndrome | 0        | 0 | 2 (8.7)  | 0 | 0 | 0 | 2 (6.5)  | 0 | 3 (23.1) | 0       | 5 (11.4) | 0       |
| Serous retinal detachment                  | 1 (33.3) | 0 | 3 (13.0) | 0 | 0 | 0 | 4 (12.9) | 0 | 1 (7.7)  | 0       | 5 (11.4) | 0       |

<sup>a</sup>Reported in  $\geq 10\%$  of patients.

**Supplementary Table 3.** Pharmacokinetic parameters on Cycle 1 Day 1

| <b>Dose</b>     | <b>Patients (n)</b> | <b>C<sub>max</sub>(nM)</b> | <b>t<sub>max</sub>(h)</b> | <b>AUC<sub>last</sub><br/>(h*nM)</b> | <b>AUC<sub>0-24h</sub><br/>(h*nM)</b> |
|-----------------|---------------------|----------------------------|---------------------------|--------------------------------------|---------------------------------------|
| 9 mg ID         | 3                   | 114 ± 35.3<br>110 (32.1)   | 1.90<br>(0.783–3.95)      | 1120 ± 125<br>1120 (11.6)            | 1130 ± 133<br>1120 (12.2)             |
| 13.5 mg ID orCD | 36                  | 260 ± 136<br>216 (77.0)    | 1.43<br>(0.500–6.00)      | 1990 ± 748<br>1850 (41.2)            | 2020 ± 762<br>1880 (41.2)             |
| 18 mg ID        | 5                   | 431 ± 272<br>344 (96.7)    | 1.02<br>(0.467–6.02)      | 3380 ± 1010<br>3240 (34.3)           | 3450 ± 1020<br>3310 (33.7)            |

Note: Values are presented as mean ± SD and geometric mean (CV%), except t<sub>max</sub>, which is reported as median (range).

AUC<sub>0-24h</sub>, area under the plasma concentration-time curve from hours 0 to 24; AUC<sub>last</sub>, area under the plasma concentration-time curve from time 0 to the last measurable concentration; CD, continuous dosing; C<sub>max</sub>, maximum plasma drug concentration; ID, intermittent dosing; t<sub>max</sub>, time to maximum plasma drug concentration.

**Supplementary Table 4.** Pharmacokinetic parameters at steady state (Cycle 1 Day 14)

| <b>Dose</b>      | <b>Patients (n)</b> | <b>C<sub>max, ss</sub> (nM)</b> | <b>t<sub>max</sub> (h)</b> | <b>t<sub>1/2</sub> (h)</b> | <b>C<sub>min, ss</sub> (nM)</b> | <b>AUC<sub>ss,0-24h</sub> (h*nM)</b> | <b>CL<sub>ss/F</sub> (L/h)</b> | <b>V<sub>z/F</sub> (L)</b> | <b>Accumulation ratio</b>   |
|------------------|---------------------|---------------------------------|----------------------------|----------------------------|---------------------------------|--------------------------------------|--------------------------------|----------------------------|-----------------------------|
| 9 mg ID          | 3                   | 155 ± 117<br>127 (89.9)         | 0.967<br>(0.917–1.00)      | 17.1 ± 7.44<br>16.1 (43.6) | 74.7 ± 60.0<br>60.4 (92.9)      | 2540 ± 2100<br>2050 (91.0)           | 10.6 ± 6.31<br>8.99 (91.0)     | 224 ± 104<br>209 (48.1)    | 2.43 ± 2.29<br>1.83 (111)   |
| 13.5 mg ID or CD | 33                  | 238 ± 139<br>195 (77.8)         | 1.02<br>(0.750–24.0)       | 15.4 ± 9.03<br>13.6 (49.2) | 66.2 ± 45.2<br>56.0 (61.0)      | 3090 ± 1680<br>2720 (55.5)           | 11.6 ± 6.52<br>10.2 (55.5)     | 258 ± 216<br>201 (76.9)    | 1.59 ± 0.767<br>1.43 (52.3) |
| 18 mg ID         | 3                   | 450 ± 285<br>385 (81.1)         | 0.833<br>(0.000–1.00)      | 20.7 ± 11.2<br>18.9 (54.3) | 203 ± 52.1<br>199 (24.7)        | 6950 ± 2780<br>6560 (43.8)           | 5.96 ± 2.50<br>5.63 (43.8)     | 205 ± 188<br>154 (116)     | 1.86 ± 0.456<br>1.83 (23.5) |

Note: Values are presented as mean ± SD and geometric mean (CV%), except t<sub>max</sub> which is reported as median (range).

AUC<sub>SS,0-24</sub>, area under the plasma concentration-time curve from hours 0 to 24 during steady state; CD, continuous dosing; CL<sub>ss/F</sub>, apparent oral dose clearance at steady state; C<sub>max,ss</sub>, maximum plasma drug concentration at steady state; C<sub>min,ss</sub>, minimum plasma drug concentration at steady state; CV, coefficient of variation; ID, intermittent dosing; QD, once daily; SD, standard deviation; t<sub>max</sub>, time to maximum plasma drug concentration; t<sub>1/2</sub>, half-life; V<sub>z/F</sub>, apparent oral volume of distribution.

**Supplementary Table 5.** Efficacy results by genomic alteration

| Dose regimen  | Solid tumor type                         | Genomic alteration                |                        | Best change in sum of target lesion diameters (%) | Best overall response |
|---------------|------------------------------------------|-----------------------------------|------------------------|---------------------------------------------------|-----------------------|
|               |                                          | Central laboratory                | Local laboratory       |                                                   |                       |
| <b>Part 1</b> |                                          |                                   |                        |                                                   |                       |
| 9 mg ID       | Gastric cancer                           | Not tested                        | Not tested             | -13.3                                             | SD                    |
| 9 mg ID       | Other (medulloblastoma)                  | Not tested                        | No alteration detected | - <sup>a</sup>                                    | PD                    |
| 9 mg ID       | Other (epithelioid hemangioendothelioma) | Not tested                        | Not tested             | -12.6                                             | SD                    |
| 13.5 mg ID    | Other (intrahepatic cholangiocarcinoma)  | No alteration detected            | Not tested             | 4.4                                               | SD                    |
| 13.5 mg ID    | Cholangiocarcinoma                       | <i>FGF1</i> amp, <i>FGFR2</i> amp | Not tested             | -8.5                                              | SD                    |
| 13.5 mg ID    | Other (lower bile duct cancer)           | <i>FGF6</i> mutation (p.S143N)    | Not tested             | -5.1                                              | SD                    |
| 13.5 mg ID    | Colorectal cancer                        | <i>FGFR1</i> amp                  | <i>FGFR1</i> amp       | -21.1                                             | PD                    |
| 13.5 mg ID    | Lung cancer (NSCLC)                      | Not tested                        | Not tested             | -29.0                                             | SD                    |
| 13.5 mg ID    | Breast cancer                            | Not tested                        | No alteration detected | 28.1                                              | PD                    |
| 18 mg ID      | Other (intrahepatic cholangiocarcinoma)  | No alteration detected            | <i>FGFR2</i> fusion    | 0                                                 | SD                    |
| 18 mg ID      | Other (intrahepatic cholangiocarcinoma)  | Not tested                        | Not tested             | 16.7                                              | PD                    |
| 18 mg ID      | Other (Pancreatic head cancer)           | Not tested                        | No alteration detected | 1.0                                               | PD                    |
| 18 mg ID      | Other (oropharyngeal cancer)             | No alteration detected            | Not tested             | - <sup>a</sup>                                    | - <sup>a</sup>        |

|               |                                                        |                                        |                                 |                |    |
|---------------|--------------------------------------------------------|----------------------------------------|---------------------------------|----------------|----|
| 18 mg ID      | Neuroendocrine cancer                                  | Not tested                             | <i>FGF6/23</i> amp              | 37.5           | PD |
| <b>Part 2</b> |                                                        |                                        |                                 |                |    |
| 13.5 mg ID    | Cholangiocarcinoma                                     | <i>FGFR3</i> mutation                  | Not tested                      | 30.9           | PD |
| 13.5 mg ID    | Gallbladder cancer                                     | No alteration detected                 | <i>FGFR3</i> mutation           | 25.0           | PD |
| 13.5 mg ID    | Cholangiocarcinoma                                     | <i>FGFR2</i> alteration                | <i>FGFR2</i> translocation      | -13.8          | SD |
| 13.5 mg ID    | Other (intrahepatic cholangiocarcinoma)                | <i>FGFR3</i> fusion                    | Not tested                      | 65.2           | PD |
| 13.5 mg ID    | Colorectal cancer                                      | <i>FGFR1</i> amp                       | Not tested                      | 44.7           | PD |
| 13.5 mg ID    | Esophageal cancer                                      | <i>FGFR1</i> amp                       | Not tested                      | 6.5            | SD |
| 13.5 mg ID    | Esophageal cancer                                      | <i>FGF3/4/12/19</i> amp                | Not tested                      | 34.9           | PD |
| 13.5 mg ID    | Esophageal cancer                                      | <i>FGFR1</i> amp, <i>FGF3/4/19</i> amp | Not tested                      | 37.8           | PD |
| 13.5 mg ID    | Esophageal cancer                                      | <i>FGFR1</i> amp, <i>FGF3/4/19</i> amp | Not tested                      | 3.0            | PD |
| 13.5 mg ID    | Esophageal cancer                                      | <i>FGF3/4/19</i> amp                   | <i>FGF19</i> amp                | — <sup>a</sup> | PD |
| 13.5 mg ID    | Breast cancer                                          | <i>FGFR1</i> amp                       | Not tested                      | 18.1           | PD |
| 13.5 mg ID    | Urothelial tract/ bladder cancer (renal pelvis cancer) | <i>FGF3/4/19</i> amp                   | Not tested                      | 24.2           | PD |
| 13.5 mg ID    | Other (urachal cancer)                                 | <i>FGF3</i> amp                        | Not tested                      | 44.8           | PD |
| 13.5 mg ID    | Pancreatic cancer (neuroendocrine)                     | <i>FGFR1</i> amp                       | <i>FGFR1</i> mutation (p.N577K) | 40.8           | PD |
| 13.5 mg ID    | Lung cancer (NSCLC)                                    | <i>FGFR1</i> amp, <i>FGF12</i> amp     | Not tested                      | 22.2           | PD |



|            |                                                        |                                               |                                         |       |    |
|------------|--------------------------------------------------------|-----------------------------------------------|-----------------------------------------|-------|----|
| 13.5 mg ID | Other (apocrine sweat gland carcinoma)                 | <i>FGFR2</i> amp                              | Not tested                              | -42.1 | PR |
| 13.5 mg ID | Urothelial tract/ bladder cancer (bladder cancer)      | <i>FGFR3</i> mutation (p.Y373C)               | Not tested                              | -19.6 | SD |
| 13.5 mg CD | Cholangiocarcinoma                                     | No alteration detected                        | <i>FGFR2</i> translocation              | -30.6 | PR |
| 13.5 mg CD | Gallbladder cancer                                     | <i>FGF3/4/19</i> amp                          | Not tested                              | -43.8 | PR |
| 13.5 mg CD | Colorectal cancer                                      | No alteration detected                        | <i>FGF19</i> amp                        | 41.0  | PD |
| 13.5 mg CD | Colorectal cancer                                      | <i>FGFR1</i> amp                              | Not tested                              | 26.5  | PD |
| 13.5 mg CD | Breast cancer                                          | Not tested                                    | <i>FGFR2</i> amp                        | -26.2 | SD |
| 13.5 mg CD | Breast cancer                                          | Not tested                                    | <i>FGFR1</i> amp, <i>FGFR3</i> mutation | 6.4   | NE |
| 13.5 mg CD | Breast cancer                                          | Not tested                                    | <i>FGFR2</i> amp                        | -44.4 | PR |
| 13.5 mg CD | Urothelial tract/ bladder cancer (bladder cancer)      | <i>FGF3/4/19</i> amp, <i>FGFR3</i> alteration | Not tested                              | -37.2 | PR |
| 13.5 mg CD | Other (rectal cancer)                                  | <i>FGFR1</i> amp                              | Not tested                              | 0.0   | SD |
| 13.5 mg CD | Other (uterine cervix carcinoma)                       | <i>FGFR2</i> amp                              | Not tested                              | 22.7  | PD |
| 13.5 mg CD | Other (prostate cancer)                                | <i>FGFR1</i> amp                              | Not tested                              | 15.2  | PD |
| 13.5 mg CD | Urothelial tract/ bladder cancer (renal pelvis cancer) | <i>FGF3/4/19</i> amp                          | Not tested                              | 12.1  | PD |
| 13.5 mg CD | Esophageal cancer                                      | <i>FGFR3</i> translocation: fusion            | <i>FGFR3</i> translocation: fusion      | -4.3  | SD |

<sup>a</sup> Missing baseline and/or postbaseline disease assessment.

amp, amplification; CD, continuous dosing; FGFR, fibroblast growth factor receptor; ID, intermittent dosing; NE, not evaluable; NSCLC, non-small cell lung cancer; PD, progressive disease; PR, partial response; SD, stable disease.

## Supplementary Figures

**Supplementary Figure 1.** FIGHT-102 study design. FGF, fibroblast growth factor; FGFR, fibroblast growth factor receptor; LDL, lower dose level; PK, pharmacokinetics; QD, once daily; RP2D, recommended phase 2 dose.

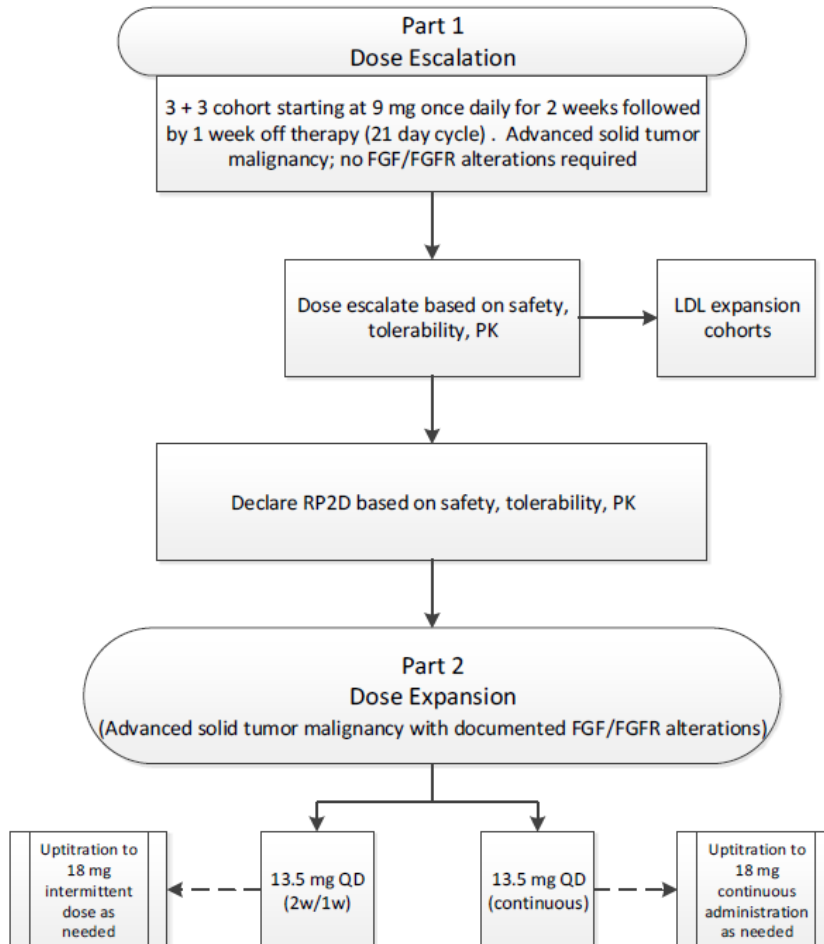

**Supplementary Figure 2.** Comparison of pemigatinib exposures at 13.5 mg once daily in FIGHT-101 and FIGHT-102. Data are presented as mean  $\pm$  SD and geometric mean (CV%). <sup>a</sup>In FIGHT-101, 50 and 29 patients received 13.5 mg QD in the ID and CD regimens, respectively. <sup>b</sup>In FIGHT-102, 23 and 13 patients received 13.5 mg QD in the ID and CD regimens, respectively. AUC<sub>ss,0–24</sub>, area under the plasma concentration-time curve from hour 0 to 24 at steady state; CD, continuous dosing; C<sub>max,ss</sub>, maximum plasma drug concentration at steady state; CV, coefficient of variation; h, hour; ID, intermittent dosing; nM, nanomolar; SD, standard deviation.

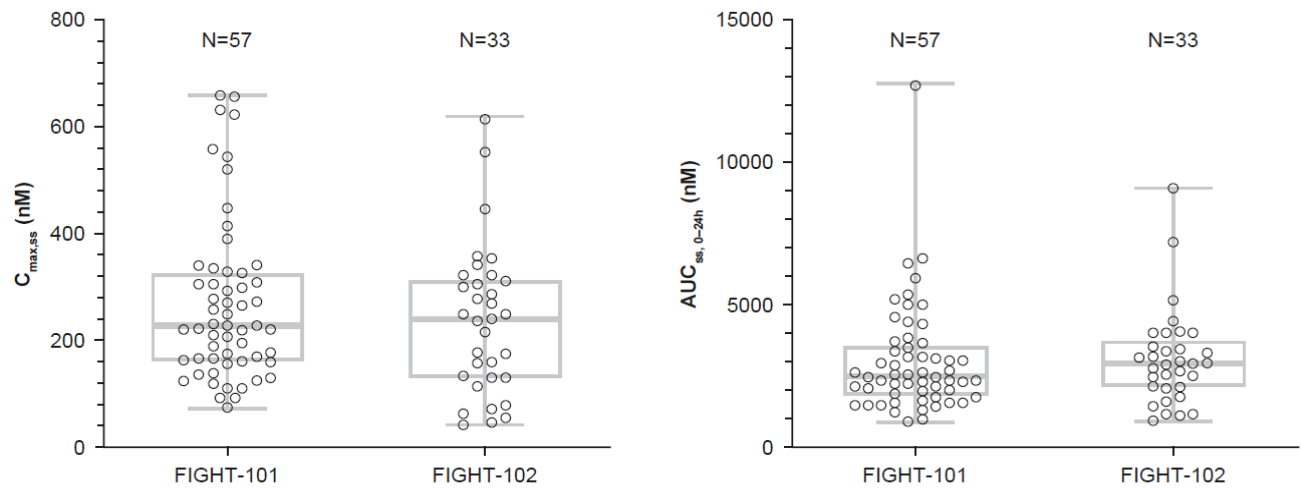

| Population | Patients (n) | C <sub>max,ss</sub> (nM)    | AUC <sub>ss,0-24h</sub> (h*nM) |
|------------|--------------|-----------------------------|--------------------------------|
| FIGHT-101  | 57           | 271 $\pm$ 151<br>236 (56.4) | 3010 $\pm$ 1890<br>2620 (54.1) |
| FIGHT-102  | 33           | 238 $\pm$ 139<br>195 (77.8) | 3090 $\pm$ 1680<br>2720 (55.5) |

**Supplementary Figure 3.** Induction of plasma *FGF23* after treatment with pemigatinib 13.5

mg. Fold changes from baseline in *FGF23* expression were plotted for individual patients receiving pemigatinib 13.5-mg on ID or CD schedules. Boxes denote the first and third quartiles, lines represent the median, and the whiskers show the limits of  $1.5 \times \text{IQR}$ . Dashed grey line denotes no fold change from baseline. C, cycle; CD, continuous dosing; D, day; *FGF23*, fibroblast growth factor 23; ID, intermittent dosing; IQR, interquartile range.

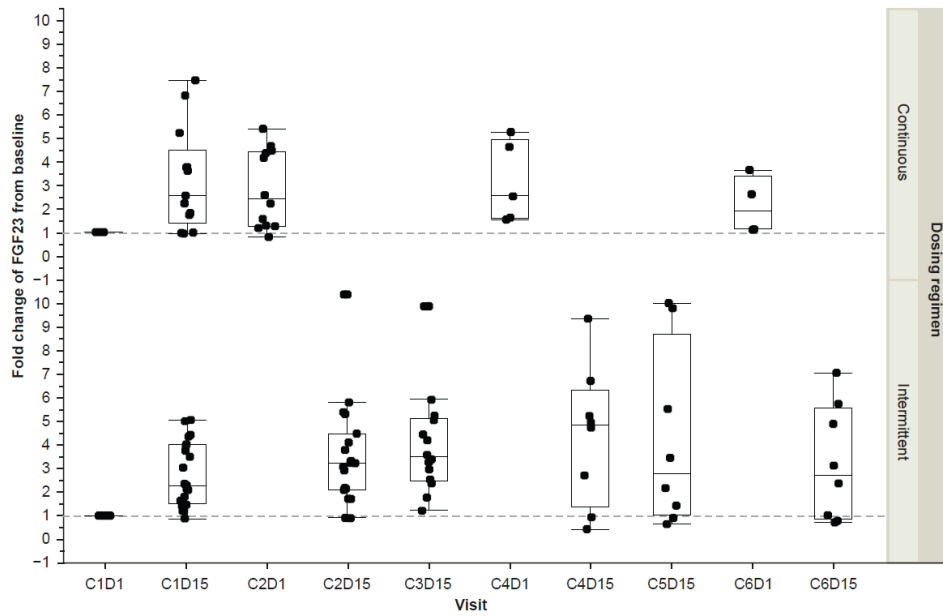

**Supplementary Figure 4.** Inhibition of FGFR2 $\alpha$  phosphorylation at trough pemigatinib concentration (Cycle 1 Day 15, 0 hours) in the KATO III *ex vivo* assay. Data are presented as mean  $\pm$  SD. Dashed line shows 80% inhibition of FGFR2 $\alpha$  phosphorylation. FGFR2 $\alpha$ , fibroblast growth factor receptor 2-alpha; SD, standard deviation.

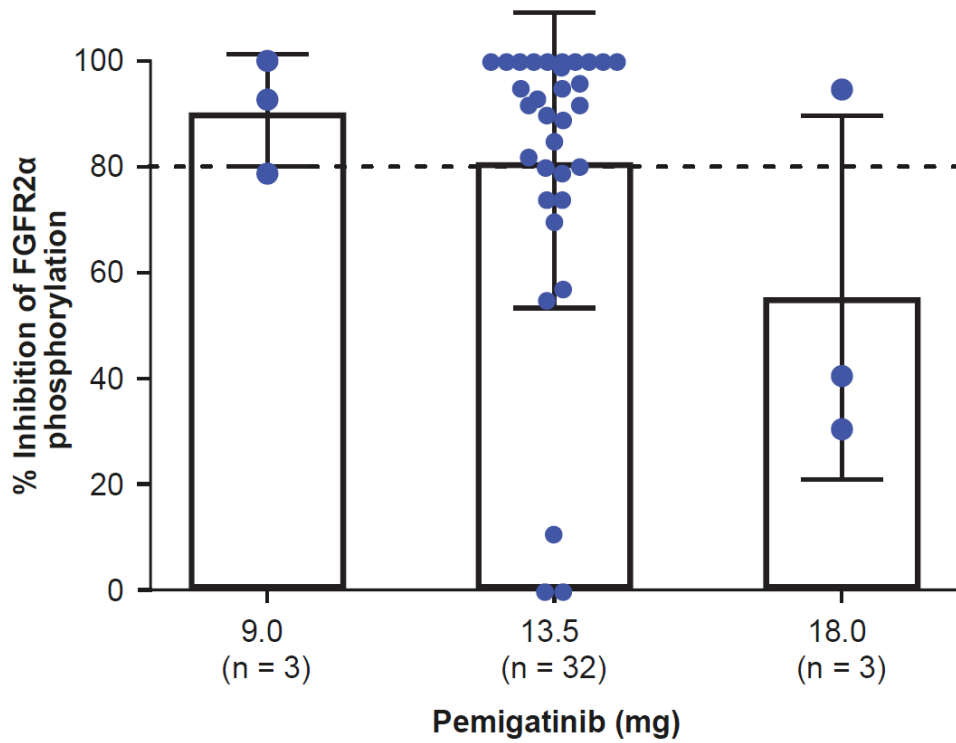

Supplement: CAM4-12-10597-s001.pdf [file CAM4-12-10597-s001.pdf]
